# Supplementary material for: Educational leadership for equitable digital and artificial intelligence transformation in global education
Source: Research Square preprint supplement (doi:10.21203/rs.3.rs-8510829/v1), 2026-02-10
Supplement: Supplementary file 1 [file 2b8607d912df5d021665cded.docx]

## Appendix

## Table 3A. Results of Hybrid Thematic-Content- (HTC-SWOT) Analysis

| **No** | **Theme** | **Key Insight** | **Description** | **Strengths** | **Weaknesses** | **Opportunities** | **Threats** | **Source** |
| --- | --- | --- | --- | --- | --- | --- | --- | --- |
|  | Technology as a Means of Social Justice in Education | Digital platforms increase inclusivity of learning for marginalized groups | MOOC and LMS-based learning have helped underprivileged groups to access quality education (Smith, 2022) | Providing open access to educational resources | Depends on stable internet availability | Partnership with technology providers to develop infrastructure | The risk of spreading invalid information on digital platforms | Smith (2023), Chang & McLaren (2018) |
|  | Digital Equity | Addressing socio-economic barriers | Ensuring equal access to digital tools | Increased connectivity | Cost constraints | Government & private partnerships | Widening digital divide | Mulaudzi (2024), Uygur et al. (2020) |
|  | Inclusion challenges | Persistent digital gaps affect marginalized groups | Awareness of the problem | Lack of structured policies | Growth of digital inclusion initiatives | Resistance from traditional systems | Lourens & Truter (2023), Floyd (2023) |
|  | Infrastructure and resource gaps hinder online learning accessibility | Many students lack devices and internet connectivity | Increased awareness of digital gaps | High costs of infrastructure development | Investment in public-private partnerships | Persistent socio-economic disparities | Pittman et al. (2021), Ferreira Santos (2024), Lee (2022) |
|  | Digital Inequality | Access gaps limit learning opportunities | Socio-economic disparities restrict access to technology and quality education | Raises awareness of disparities | Limits education equity | Policy intervention can bridge gaps | Digital exclusion worsens inequalities | Brink et al., (2024), Das et al. (2020), Cruz-Sandoval (2024) |
|  | Access is uneven | Rural and poor students face device/internet gaps | – | Infrastructure gaps | Targeted digital investment | Widening educational gap | Ryan & Deci (2020), Fernandez & Shaw (2020) |
|  | Leadership in Digital Education | Effective strategies for inclusion | Engaging stakeholders and training faculty | Student-centric approaches | Resistance to change | Institutional collaborations | Lack of policy implementation | Vojinovikj et al. (2024), Alexandroa & Basrowib (2024) |
|  | AI in Education | Enhancing learning outcomes | AI-driven interventions in special education | Personalized learning | Ethical concerns | Advanced analytics for decision-making | Data privacy issues | Yang et al. (2024) |
|  | Enhances personalized learning | AI-driven learning adapts to student needs | Data-driven insights improve education | Biases and ethical concerns | AI can optimize digital education | Risk of algorithmic discrimination | Bhuttah et al. (2024) |
|  | Strategic Planning | Vision-driven leadership | Aligning digital initiatives with institutional goals | Long-term impact | Need for continuous evaluation | Global benchmarking | Policy misalignment | Armas & Jugo (2024) |
|  | Psychological Safety | Fostering an inclusive digital culture | Encouraging a safe online learning environment | Increased engagement | Variability in implementation | Higher retention rates | Cultural and socio-political barriers | Atuahene et al. (2024) |
|  | Inclusive Leadership | Supports diverse learning environments | Leadership fostering equity improves student outcomes | Enhances engagement and academic success | Requires systemic change | Strengthens diversity and participation | Resistance to inclusion policies | Bhuttah et al. (2024) |
|  | Diversity and belonging | Focuses on creating inclusive environments to foster innovation and equity | Builds trust and promotes innovation | May require cultural shifts | Enhanced engagement and retention | Risk of tokenism and shallow diversity | Kutch & Kutch (2021), Pham et al. (2022) |
|  | Diversity and equity focus | Promotes inclusive practices and improves employee retention | Fosters belonging and trust | Risk of tokenism | Builds innovative and inclusive cultures | Resistance to change | Smith (2023) |
|  | Digital Policies | Essential for educational sustainability | Government and institutional support necessary for digital equity | Can create sustainable frameworks | Implementation challenges | Digital literacy programs can be expanded | Policy inertia and lack of political will | Menkhoff et al. (2024) |
|  | Digital Inclusion | Digital access is crucial for equity | Leadership must ensure equitable access to technology and digital literacy training | Expanded reach, flexible learning | Infrastructure gaps, digital divide | Global collaborations, policy reforms | Socioeconomic disparities, resistance to change | Sharma et al. (2023), Uleanya (2023) |
|  | Leadership Strategies | Proactive leadership fosters adaptability | Leaders must integrate technology with inclusive policies | Innovative approaches, empowerment | Resistance to technology adoption | Development of digital leadership training | Lack of institutional support | Landa et al. (2023), Sharma et al. (2023) |
|  | Collaborative and compromising conflict-resolution styles foster digital inclusion | Collaborative and compromising styles create a supportive environment for digital inclusion | Positive impact on organizational climate | Lack of access to digital resources in developing countries | Increasing support from policymakers | Data privacy issues | Sweeney (2018), Özkan Tuncay et al. (2018), Cuéllar-Gálvez et al. (2018), Alazmi & Al-Mahdy (2022) |
|  | Layered, adaptive leadership works | Combination of distributed and ethical leadership is key | Strategic inclusivity | Organizational rigidity | Community partnerships | Bureaucratic inertia | Day et al. (2016), Leithwood et al. (2020), Fernandez & Shaw (2020) |
|  | AI in Leadership | AI enhances decision-making and mentorship | AI-driven solutions can foster diversity and inclusion | Data-driven insights, scalability | Ethical concerns, bias in AI | AI-driven policy development | Misuse of AI, digital surveillance issues | Ortega et al. (2023), Botte (2023) |
|  | AI-driven analytics improve learning outcomes | AI assists in data-driven decision-making and personalized learning | Data accuracy and scalability | Ethical concerns and algorithmic bias | AI integration in leadership training | Resistance from educators and administrators | Klein et al. (2019), Ninković & Knežević (2018) |
|  | Data-driven decision-making | AI supports personalized learning and accessibility | Enhances efficiency | Ethical concerns | Automation in inclusive education | Bias in AI algorithms | Walzer (2023), Flaig et al. (2020) |
|  | Data-driven personalization | Uses AI tools to align content with individual learning needs | Increases efficiency and accuracy | Risk of algorithmic bias | Personalized learning opportunities | Loss of human connection | Lewis (2021), Karakose & Tülübas (2024) |
|  | Hybrid wins | Human + AI = balance between efficiency and ethics | Scalability + Judgment | Bias, depersonalization | AI-augmented strategy design | Algorithmic injustice | Crawford et al. (2023), Gumus (2018) |
|  | Competency Development | Digital and entrepreneurial skills are key | Leaders must cultivate a blend of technological and strategic skills | Future-ready workforce | Training gaps, slow adaptation | Industry partnerships, skill development initiatives | Rapid technological shifts, resistance from educators | Serrano et al. (2023), Shukla et al. (2023), Felgueira et al. (2024) |
|  | Contextual, ethical, collaborative | Skills needed to transform equitably | Visionary potential | Leadership overload | Interdisciplinary training | Misalignment with policy | Hallinger (2018), Lozano (2015) |
|  | Leadership Training | Faculty competency development | Training enhances cultural and technological leadership skills | Increased digital literacy | Inconsistent institutional adoption | Scalable training programs | Funding limitations | Uddin & Johnson (2023), Gary Johns (2024) |
|  | Sustainable Digital Strategies | Long-term digital equity | Integration of digital tools for inclusive education | Future readiness | Digital resistance | Policy reforms and global collaboration | Economic disparities in tech access | Mukhuty et al. (2022), O’Sullivan (2021) |
|  | Workforce Development | Partnerships for skill-building | Connects education and industry to create career pathways | Bridges skills gaps | Requires strong coordination | Industry-aligned training opportunities | Limited funding and policy barriers | Ferguson (2022) |
|  | Co-Design with Stakeholders | Collaboration and engagement | Involves educators and students in the design of technology and learning environments | Boosts engagement and relevance | Time-intensive process | Increased adoption of inclusive practices | Resistance to change | Du & Breazeal (2022) |
|  | Transversal Skills | Globalized education skills | Emphasizes skills like communication, collaboration, and adaptability for global graduates | Prepares students for diverse workplaces | Variability in implementation | Enhanced employability | Lack of universal standards | Doyle et al. (2022) |
|  | Faculty Digital Readiness | Teachers’ preparedness affects digital transformation success | Faculty training is essential for effective technology integration | Professional development opportunities | Inconsistent training initiatives | Institutional funding for training programs | Low motivation for digital adaptation | Sork (2020) |
|  | Inclusive Governance | Community engagement strengthens digital education policies | Collaborative decision-making enhances sustainable digital policies | Participatory governance models | Bureaucratic barriers slow implementation | Strengthening local leadership | Lack of political will | Hinrichs & Johnston (2020) |
|  | Crisis Leadership | Digital strategies are crucial in times of crisis | Leadership adaptability ensures continuity in education | Rapid innovation and adoption | Short-term, reactionary policies | Long-term strategic resilience planning | Future pandemics and disruptions | Hoffman & Hernández (2020) |
|  | Distributed Leadership | Shared responsibility | Encourages collaboration and empowers educators | Builds teamwork and innovation | Cultural resistance in certain contexts | Increased participation and engagement | Misalignment with local traditions | Lu (2024) |
|  | Distributed Leadership | Shared responsibility | Enhances collaboration and empowers middle leadership | Builds trust and democratic processes | Misalignment with local cultural norms | Encourages participatory decision-making | Resistance from traditional leadership structures | Hashem & Starr (2024) |
|  | E-Leadership | Remote work facilitation | Supports employee well-being and engagement through IT tools | Flexibility and scalability | High dependence on technology | New models for remote learning | Digital divide and inequity | Maheshwari et al. (2024) |
|  | AI-Driven Decision-Making | Data-driven efficiency | Optimizes resource allocation and decision-making | Accuracy and speed | Risk of reinforcing biases | Personalization of learning | Lack of human touch and empathy | Arar et al. (2024) |
|  | Adaptive Leadership | Navigating uncertainty | Key for responding to VUCA environments | Enhances resilience and adaptability | Requires constant upskilling | Prepares leaders for future crises | Leader burnout and fatigue | Sharpley (2024) |
|  | Transformational IT Leadership | Fosters IT self-leadership | Empowers individuals to take ownership of their digital learning | Promotes innovation and adaptability | Requires high digital literacy among leaders | Accelerates digital adoption | Digital divide and unequal access | Eseryel (2024) |
|  | Crisis Leadership | Process-oriented decision-making | Effective in navigating crises such as the COVID-19 pandemic | Enhances resilience and adaptability | Reactive rather than proactive | Prepares leaders for future crises | Crisis fatigue and burnout | Harrison (2024) |
|  | Agile Leadership | Adaptive project management | Adapts to changing technologies and stakeholder needs through iterative processes | Responsive and flexible | Requires continuous adaptation | Fosters innovation and collaboration | Risk of leadership fatigue | Levitt et al. (2024) |
|  | Social Justice Leadership | Equity-focused leadership | Addresses inequities in education by focusing on marginalized communities | Promotes social equity | Resistance to change | Builds inclusive educational communities | Lack of policy support | Shaked (2023) |
|  | Cooperative Leadership | Group cohesion and shared responsibility | Encourages teamwork and reduces fragmentation within educational leadership | Improves group dynamics | Difficult to implement at large scales | Enhances teacher-student collaboration | Resistance to hierarchical change | McLennan (2023) |
|  | Digital and Social Inequalities | Barriers to digital access and social norms hinder educational quality | Lack of access to digital resources and social norms exacerbate inequalities | Increasing availability of digital resources | Resistance to change among educators | Potential for AI-driven leadership to address specific needs | Risk of exacerbating existing inequalities | Alkhaldi et al. (2024), Vaismoradi et al. (2016), Maheshwari & Nayak (2022) |
|  | AI-Driven vs. Traditional Leadership | AI-driven leadership leverages data analytics for equitable learning environments | AI-driven leadership can address specific needs of diverse student populations | Data-driven and inclusive approaches | Dependence on quality data and interpretation | Potential for more equitable learning environments | Risk of data misuse | Bustamante et al. (2024), Tan (2024), Hallinger & Kovačević ((2021) |
|  | Leadership Competencies | Ethical and supportive leadership is essential for digital transformation | Ethical and supportive leadership promotes equity and sustainability | Enhanced competencies through LDPs | Resistance to change among educators | Increasing recognition of the importance of digital literacy | Potential for burnout among leaders | Levy et al. (2023), Klahn Acuña & Male (2024), Maxwell & Riley (2017) |

## Table 3B. Proposed Policy Recommendations for Digital Leadership in Educational Inclusivity

| **No.** | **Policy Area** | **Strategic Recommendations** | **Implementation Challenges** | **Solutions** |
| --- | --- | --- | --- | --- |
|  | **Access to Digital Infrastructure** | Establish global funding mechanisms aligned with UNESCO and OECD digital equity frameworks. Strengthen public-private partnerships to bridge infrastructure gaps, particularly in low-income regions. Develop community-based digital hubs to enhance localized access. | High cost of infrastructure development and maintenance | Implement phased investment strategies and incentivize private sector involvement through tax benefits and subsidies. |
|  | **Technology for Marginalized Groups** | Mandate universal access to MOOC and LMS platforms through national digital inclusion policies. Implement regulatory frameworks to ensure internet stability in remote and underserved areas. Develop AI-powered verification tools to counter misinformation and promote fact-based digital learning. Encourage localized content creation tailored to cultural and linguistic diversity. | Internet instability in remote areas and lack of digital literacy | Expand broadband infrastructure using satellite and mobile-based technologies. Launch digital literacy campaigns through community-based programs. |
|  | **Economic Barriers** | Develop cross-sector policy frameworks integrating subsidies, low-cost device provisions, and digital financial inclusion strategies. Institutionalize corporate social responsibility (CSR) in digital education funding. Establish performance-based grants for digital infrastructure expansion in underserved communities. | Slow policy implementation and bureaucratic inefficiencies | Streamline policy approval processes and create dedicated task forces to fast-track digital inclusion initiatives. |
|  | **Digital Inclusion Strategies** | Align national education policies with global digital inclusion benchmarks. Support grassroots-driven digital literacy initiatives by providing sustainable funding and policy backing. Integrate digital competency certification into teacher training programs to enhance digital pedagogy. | Resistance from traditional education systems | Conduct awareness campaigns highlighting the benefits of digital education. Provide incentives for institutions adopting digital strategies. |
|  | **AI-Driven Learning & Decision Making** | Enforce ethical AI governance standards within educational institutions. Design mandatory AI bias mitigation training for educators and policymakers. Regulate AI-driven decision-making in student assessments, admissions, and personalized learning to ensure fairness and transparency. Promote open-access AI learning analytics for equitable decision-making. | Ethical concerns and risk of algorithmic bias | Establish independent AI ethics review boards and implement transparency measures for AI-based decision-making processes. |
|  | **Leadership & Institutional Adaptation** | Establish global benchmarking systems for evaluating digital leadership effectiveness. Implement continuous feedback mechanisms and AI-assisted audits for institutional digital strategies. Develop international consortiums for collaborative digital leadership capacity-building. | Policy misalignment and resistance to change | Foster international cooperation through policy dialogues and leadership exchange programs. |
|  | **Diversity & Inclusion in STEM** | Expand mentorship and sponsorship programs targeting underrepresented groups in STEM. Develop gender- and disability-inclusive STEM curricula with culturally responsive pedagogy. Implement policy-driven reforms to address systemic biases and create equitable career pathways in STEM fields. | Limited access to funding and resources | Secure dedicated funding streams for diversity initiatives and establish STEM access programs in underserved areas. |
|  | **Sustainable Digital Equity** | Institutionalize long-term national and regional digital literacy programs with government and NGO collaboration. Strengthen global digital equity frameworks by aligning with Sustainable Development Goals (SDGs). Ensure continuous funding through multi-stakeholder investment in sustainable tech initiatives. | Policy inertia and lack of political will | Establish accountability frameworks and tie digital equity progress to international development indices. |
|  | **Data-Driven Decision Making** | Establish ethical accountability frameworks for AI-driven educational policies. Mandate AI ethics certification for policymakers, educators, and ed-tech developers. Promote hybrid decision-making models that integrate AI insights with human expertise to avoid over-reliance on automation. | Risk of reinforcing biases in AI models | Regularly audit AI models and ensure diverse data sets are used to train algorithms. |
|  | **Remote & Crisis Management** | Develop long-term crisis response blueprints for digital education resilience. Provide structured digital leadership training emphasizing adaptability and crisis mitigation. Implement psychological and professional well-being programs to prevent digital leadership burnout. | Leader burnout and crisis fatigue | Introduce mental health support programs and adaptive workload management for digital education leaders. |

## Global Equity Implementation Matrix (GEIM) for Digital-AI Education Leadership

## Table 3C. Global Equity Implementation Matrix (GEIM) – A Multi-Level Action Framework

| **Implementation Level** | **Strategic Goal** | **EDT-TL Dimension** | **Core Actions** | **Equity Metrics** | **Key Stakeholders** | **Timeline** |
| --- | --- | --- | --- | --- | --- | --- |
| **GLOBAL & SUPRANATIONAL** | **Establish Ethical-AI Governance Standards** | **ETHICAL** | 1. Develop UNESCO-aligned AI ethics guidelines for education 2. Create cross-border data privacy protocols 3. Establish global algorithmic audit standards | • Number of countries adopting equity-focused AI guidelines • Reduction in reported algorithmic bias incidents | UNESCO, OECD, World Bank, Global Ed-Tech Alliances | 2–5 years |
| **NATIONAL & POLICY** | **Bridge Digital Infrastructure Divides** | **DISTRIBUTED** | 1. Implement national digital equity funds 2. Mandate public-private infrastructure partnerships 3. Develop context-sensitive AI adoption roadmaps | • Gini coefficient for digital resource distribution • Rural-urban internet access parity index | Ministries of Education, Telecommunications Regulators, CSR Departments | 1–3 years |
| **INSTITUTIONAL** | **Foster Inclusive Digital-AI Cultures** | **TRANSFORMATIONAL** | 1. Establish ethical AI review committees 2. Implement distributed leadership structures 3. Create digital inclusion innovation labs | • Diversity in digital leadership positions • Student satisfaction with inclusive tech tools | University/School Leadership, Faculty Senates, Student Unions | 1–2 years |
| **DEPARTMENTAL/TEAM** | **Build Capacity for Ethical AI Integration** | **TECHNOLOGICALLY-ENHANCED** | 1. Conduct regular AI bias detection workshops 2. Develop AI-augmented teaching teams 3. Create peer mentoring networks for digital leadership | • Teacher AI literacy assessment scores • Frequency of ethical AI discussions in team meetings | Department Heads, IT Directors, Teacher Leaders | 6–18 months |
| **INDIVIDUAL & PRACTITIONER** | **Cultivate Equity-Centered Digital Leadership Competencies** | **ALL FOUR DIMENSIONS** | 1. Complete digital leadership certification programs 2. Engage in reflective ethical practice journals 3. Participate in global professional learning communities | • Competency self-assessment improvements • Implementation of equity-focused digital interventions | Individual Educators, School Leaders, Policymakers | Continuous |

## Table 3D. Contextual Adaptation Guidelines for Global Implementation

| **Regional Context** | **Priority Equity Challenge** | **Recommended GEIM Adaptation** | **Potential Partnerships** | **Risk Mitigation Strategies** |
| --- | --- | --- | --- | --- |
| **Global North** | Algorithmic bias in personalized learning systems | Focus on **ethical AI auditing** and **transparent algorithm design** | Tech companies, AI ethics research centers | • Regular third-party audits • Student data protection frameworks |
| **Global South** | Infrastructure gaps and digital access disparities | Prioritize **mobile-first solutions** and **offline-capable AI tools** | Mobile network operators, NGOs, international aid agencies | • Phased implementation plans • Community-based digital literacy programs |
| **Conflict-Affected & Crisis Regions** | Educational continuity and psychological safety | Emphasize **adaptive leadership** and **low-tech resilience strategies** | UN agencies, humanitarian organizations, local community leaders | • Flexible, modular approaches • Trauma-informed digital pedagogy |
| **Indigenous & Minority Communities** | Cultural relevance and linguistic preservation | Integrate **local knowledge systems** and **multilingual AI interfaces** | Cultural organizations, indigenous leadership, language preservation groups | • Co-design with community elders • Indigenous data sovereignty protocols |

## Table 3E. Monitoring & Evaluation Framework for Equity Outcomes

| **Equity Dimension** | **Short-Term Indicators (0–1 year)** | **Medium-Term Indicators (1–3 years)** | **Long-Term Indicators (3–5+ years)** | **Data Collection Methods** |
| --- | --- | --- | --- | --- |
| **Access Equity** | • Device-to-student ratio improvements • Internet connectivity in underserved schools | • Reduction in digital access Gini coefficient • Increased digital resource utilization | • Elimination of digital deserts • Universal basic digital access achieved | • Infrastructure surveys • Usage analytics • Equity audits |
| **Participation Equity** | • Diverse stakeholder representation in digital planning • Inclusive design workshops conducted | • Marginalized group participation rates in digital programs • Reduction in digital skill gaps | • Equitable digital leadership representation • Sustained inclusive participation patterns | • Participation tracking • Focus groups • Demographic analysis |
| **Outcome Equity** | • Bias detection in AI systems implemented • Digital learning outcome disparities monitored | • Reduction in algorithmic bias incidents • Closing of digital achievement gaps | • Elimination of AI-mediated discrimination • Equitable educational outcomes across groups | • Learning analytics • Algorithmic audits • Longitudinal studies |

## Table 3F. Resource Allocation & Investment Priorities

| **Investment Area** | **Priority Level** | **Recommended Allocation** | **Expected Equity Impact** | **Implementation Partners** |
| --- | --- | --- | --- | --- |
| **Digital Infrastructure** | HIGH (Global South) | 40–50% of total equity budget | Immediate access improvements for 50M+ learners | Governments, development banks, private sector |
| **Leadership Capacity Building** | HIGH (All Regions) | 25–30% of total equity budget | 100K+ leaders trained in EDT-TL competencies | Universities, professional associations, NGOs |
| **Ethical AI Development** | MEDIUM-HIGH | 15–20% of total equity budget | Reduction in algorithmic bias by 60–70% | Tech companies, research institutions, ethics boards |
| **Research & Evaluation** | MEDIUM | 5–10% of total equity budget | Evidence-based scaling of successful interventions | Academic institutions, think tanks, monitoring agencies |

**Visual Summary: The GEIM Implementation Cycle**


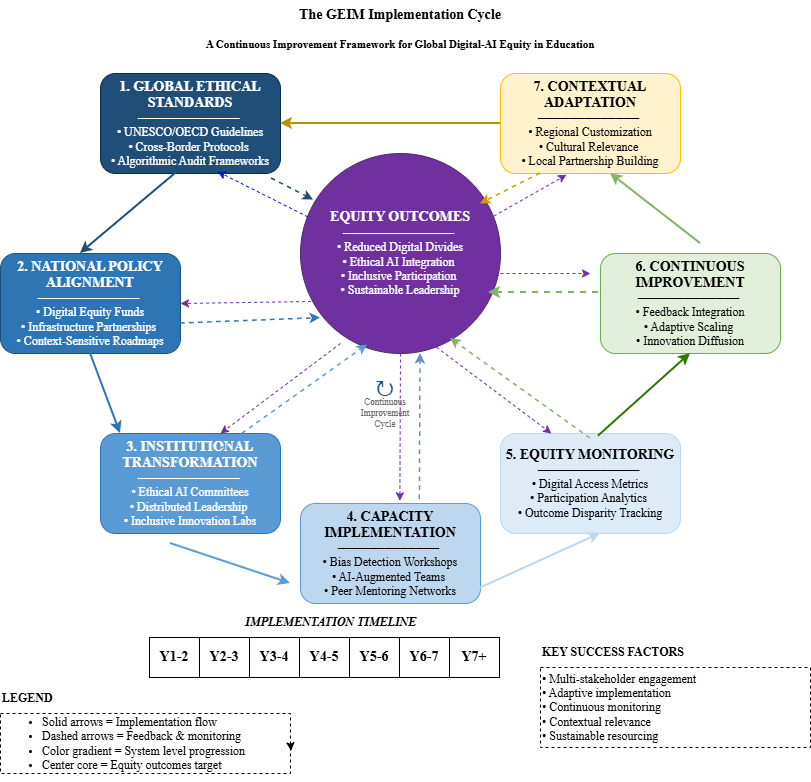


**Key Implementation Principles Derived from Supplementary Tables 3A & 3B:**

1. **From Supplementary Table 3A (Barriers Analysis):**
   - **Infrastructure gaps** require **phased, targeted investments** rather than one-size-fits-all approaches
   - **Algorithmic bias** necessitates **preventive ethical design** not just reactive fixes
   - **Cultural marginalization** demands **co-design with affected communities**
2. **From Supplementary Table 3B (Policy Recommendations):**
   - **Multi-stakeholder governance** is essential for sustainable implementation
   - **Digital literacy must be integrated** with critical thinking about AI ethics
   - **Long-term sustainability** requires **institutionalizing equity metrics** in performance evaluation

**Practical Application Guidelines:**

**For Policymakers:**

1. Start with **rapid equity assessments** to identify priority gaps
2. Establish **multi-sector implementation task forces**
3. Create **incentive structures** for equity-focused innovation

**For Institutional Leaders:**

1. Conduct **digital equity audits** using GEIM metrics
2. Develop **context-specific implementation roadmaps**
3. Establish **continuous improvement feedback loops**

**For Researchers & Evaluators:**

1. Track **both quantitative metrics and qualitative experiences**
2. Document **contextual adaptations and lessons learned**
3. Contribute to **global knowledge sharing networks**

**This GEIM framework provides a comprehensive, actionable roadmap for implementing the EDT-TL model globally while maintaining contextual sensitivity and measurable equity outcomes.** The matrix integrates insights from both the main manuscript and supplementary materials, offering a practical tool for transforming theoretical frameworks into tangible educational equity improvements.

Alazmi, A. A., & Al-Mahdy, Y. F. H. (2022). Principal authentic leadership and teacher engagement in Kuwait’s educational reform context. *Educational Management Administration and Leadership*, *50*(3), 392–412. https://doi.org/10.1177/1741143220957339

Alexandro, R., & Basrowi. (2024). Measuring the effectiveness of smart digital organizations on digital technology adoption: An empirical study of educational organizations in Indonesia. *International Journal of Data and Network Science*, *8*(1), 139–150. https://doi.org/10.5267/j.ijdns.2023.10.009

Alkhaldi, M., Najjar, S., Basuoni, A. Al, Obaid, H. A., Mughnnamin, I., Falana, H., Sultan, H. O., & Aljeesh, Y. I. (2024). The Governance, Policy, Process, and Capacity of Health Workforce Regulation and Accreditation: Qualitative Policy Analysis and Evidence from Palestine. *Journal of Healthcare Leadership*, *16*, 303–314. https://doi.org/10.2147/JHL.S470670

Arar, K., Tlili, A., & Salha, S. (2024). Human-Machine symbiosis in educational leadership in the era of artificial intelligence (AI): Where are we heading? *Educational Management Administration and Leadership*. https://doi.org/10.1177/17411432241292295

Armas, K. L., & Jugo, R. R. (2024). Education for a Sustainable Future: Analysis of Universitiesvision and Mission Statements in Line With Global Sustainable development Goals. *Journal of Lifestyle and SDGs Review*, *4*(1), e01790. https://doi.org/10.47172/2965-730x.sdgsreview.v4.n00.pe01790

Atuahene, S. A., Qian, X. S., & Ahotovi, T. A. (2024). Impact of psychological safety and inclusive leadership on online learning satisfaction: the role of organizational support. *Humanities and Social Sciences Communications*, *11*(1), 685. https://doi.org/10.1057/s41599-024-03196-x

Bhuttah, T. M., Xusheng, Q., Abid, M. N., & Sharma, S. (2024). Enhancing student critical thinking and learning outcomes through innovative pedagogical approaches in higher education: the mediating role of inclusive leadership. *Scientific Reports*, *14*(1), 24362. https://doi.org/10.1038/s41598-024-75379-0

Botte, G. G. (2023). Transitioning Electrochemical Technologies into Agriculture via the National Science Foundation Engineering Research Center Model. *The Electrochemical Society Interface*, *32*(3), 69–73. https://doi.org/10.1149/2.F10233IF

Brink, A., Israel, O., Nadel, H., Arevalo-Pardo, M., Kalinchuk, O., Estrada-Lobato, E., Naydenova, M., Drace, M., & Paez, D. (2024). Towards a More Inclusive Future: A Comprehensive Assessment of Gender Diversity in Nuclear Medicine Education, Training and Workforce. *Seminars in Nuclear Medicine*, *54*(2), 184–190. https://doi.org/10.1053/j.semnuclmed.2023.10.006

Bustamante, A., Salazar Lopez, B., Jones, E., Turk, M., Tapia Arellano, M. F., Treminio, S., Rata, M., Msokera, C., Daradkeh, H., Barkhordarzadeh, A., Umutoni, A., Bautista, A., Naidu, P., Munabi, N., Magee III, W., Cote, E., Magee, K., & Auslander, A. (2024). Breaking the Glass Ceiling: A Multiregional Study of Mentorship and Leadership in All-Women Surgical Teams. *Journal of Healthcare Leadership*, *Volume 16*, 403–414. https://doi.org/10.2147/JHL.S472364

Chang, B. “Benji,” & McLaren, P. (2018). Emerging issues of teaching and social justice in Greater China: Neoliberalism and critical pedagogy in Hong Kong. *Policy Futures in Education*, *16*(6), 781–803. https://doi.org/10.1177/1478210318767735

Crawford, J., Cowling, M., & Allen, K. A. (2023). Leadership is needed for ethical ChatGPT: Character, assessment, and learning using artificial intelligence (AI). *Journal of University Teaching and Learning Practice*, *20*(3). https://doi.org/10.53761/1.20.3.02

Cruz-Sandoval, M., Vázquez-Parra, J. C., Carlos-Arroyo, M., & Amézquita-Zamora, J. A. (2024). Student Perception of the Level of Development of Complex Thinking: An Approach Involving University Women in Mexico. *Journal of Latinos and Education*, *23*(2), 768–780. https://doi.org/10.1080/15348431.2023.2180370

Cuéllar-Gálvez, D., Aranda-Camacho, Y., & Mosquera-Vásquez, T. (2018). A Model to Promote Sustainable Social Change Based on the Scaling up of a High-Impact Technical Innovation. *Sustainability*, *10*(12), 4532. https://doi.org/10.3390/su10124532

Das, M., Marghitu, D., Jamshidi, F., Mandala, M., & Howard, A. (2020). Accessible computer science for k-12 students with hearing impairments. In *Lecture Notes in Computer Science (including subseries Lecture Notes in Artificial Intelligence and Lecture Notes in Bioinformatics): Vol. 12189 LNCS* (pp. 173–183). https://doi.org/10.1007/978-3-030-49108-6_13

Day, C., Gu, Q., & Sammons, P. (2016). The Impact of Leadership on Student Outcomes. *Educational Administration Quarterly*, *52*(2), 221–258. https://doi.org/10.1177/0013161X15616863

Doyle, P., Keegan, B., Gordon, D., Becevel, A., Gibson, P. J., Jiang, Z., & O’Sullivan, D. (2022). The World Is Our Classroom: Developing a Model for International Virtual Internships - The Global Innovations Project. *International Conference on Computer Supported Education, CSEDU - Proceedings*, *1*, 297–303. https://doi.org/10.5220/0011075900003182

Du, X., & Breazeal, C. (2022). Exploring changes in special education teachers’ attitudes and design belief towards pedagogical agents in co-designing with children. *Interaction Design and Children*, 472–478. https://doi.org/10.1145/3501712.3535289

Eseryel, U. Y. (2024). Can Your Leadership Increase Mine? Enabling IT Self-Leadership Through Transformational IT Leadership. *Journal of Leadership, Accountability and Ethics*, *21*(3). https://doi.org/10.33423/jlae.v21i3.7215

Felgueira, T., Paiva, T., Alves, C., & Gomes, N. (2024). Empowering Women in Tech Innovation and Entrepreneurship: A Qualitative Approach. *Education Sciences*, *14*(10), 1127. https://doi.org/10.3390/educsci14101127

Ferguson, D. (2022). A commentary and call to action for inclusive workforce development. *Families, Systems, & Health*, *40*(4), 606–608. https://doi.org/10.1037/fsh0000772

Fernandez, A. A., & Shaw, G. P. (2020). Academic Leadership in a Time of Crisis: The Coronavirus and COVID-19. *Journal of Leadership Studies*, *14*(1), 39–45. https://doi.org/10.1002/jls.21684

Ferreira Santos, L. (2024). Internationalisation in the digital transformation: A scoping review. *Higher Education Quarterly*, *78*(3), 807–824. https://doi.org/10.1111/hequ.12488

Flaig, J., Alam, A., Huynh, J., Reid-Hector, J., & Heuer, A. (2020). Examining How Formal Leadership Development Programs Positively Influence Hospital Leaders’ Individual Competencies and Organizational Outcomes – An Evidence-Based Literature Review. *Journal of Healthcare Leadership*, *12*(null), 69–83. https://doi.org/10.2147/JHL.S239676

Floyd, A., Baxter, J., Morales, A., & Bari, R. (2023). Leading online learning during a pandemic and beyond: Challenges and opportunities for school leaders in England. *Educational Management Administration & Leadership*. https://doi.org/10.1177/17411432231191171

Gumus, S., Bellibas, M. S., Esen, M., & Gumus, E. (2018). A systematic review of studies on leadership models in educational research from 1980 to 2014. *Educational Management Administration & Leadership*, *46*(1), 25–48. https://doi.org/10.1177/1741143216659296

Hallinger, P. (2018). Bringing context out of the shadows of leadership. *Educational Management Administration & Leadership*, *46*(1), 5–24. https://doi.org/10.1177/1741143216670652

Hallinger, P., & Kovačević, J. (2021). Science mapping the knowledge base in educational leadership and management: A longitudinal bibliometric analysis, 1960 to 2018. *Educational Management Administration and Leadership*, *49*(1), 5–30. https://doi.org/10.1177/1741143219859002

Harrison, C. (2024). Leadership During a Crisis: A Focus on Leadership Development. In *Leadership During a Crisis: A Focus on Leadership Development*. Routledge. https://doi.org/10.4324/9781003344629

Hashem, R., & Starr, K. (2024). Imported policy ideals and distributed leadership in Jordanian schools. *Educational Management Administration & Leadership*, *52*(6), 1334–1351. https://doi.org/10.1177/17411432221134393

Hinrichs, M. M., & Johnston, E. W. (2020). The creation of inclusive governance infrastructures through participatory agenda-setting. *European Journal of Futures Research*, *8*(1), 10. https://doi.org/10.1186/s40309-020-00169-6

Hoffman, J. L., & Hernández, S. (2020). *Delta Change* (pp. 1–22). https://doi.org/10.4018/978-1-7998-2410-7.ch001

Johns, G. (2024). The context deficit in leadership research. *The Leadership Quarterly*, *35*(1), 101755. https://doi.org/10.1016/j.leaqua.2023.101755

Karakose, T., & Tulubas, T. (2024). School Leadership and Management in the Age of Artificial Intelligence (AI): Recent Developments and Future Prospects. *Educational Process International Journal*, *13*(1). https://doi.org/10.22521/edupij.2024.131.1

Klahn Acuña, B., & Male, T. (2024). Toxic leadership and academics’ work engagement in higher education: A cross-sectional study from Chile. *Educational Management Administration & Leadership*, *52*(3), 757–773. https://doi.org/10.1177/17411432221084474

Klein, C., Lester, J., Rangwala, H., & Johri, A. (2019). Learning Analytics Tools in Higher Education: Adoption at the Intersection of Institutional Commitment and Individual Action. *The Review of Higher Education*, *42*(2), 565–593. https://doi.org/10.1353/rhe.2019.0007

Kutch, B. D. M., & Kutch, J. S. M. (2021). Innovation Through Diversity and Inclusion: A Roadmap for Higher Education Information Technology Leaders. In *Research Anthology on Cross-Industry Challenges of Industry 4.0* (Vol. 4, pp. 1811–1833). IGI Global. https://doi.org/10.4018/978-1-6684-2405-6.ch089

Landa, E., Zhu, C., Sesabo, J., & Machumu, H. (2023). Leader support and the integration of innovative teaching–learning technologies: the mediating role of technological level of knowledge. *Education and Information Technologies*, *28*(12), 15523–15541. https://doi.org/10.1007/s10639-023-11776-8

Lee, T. T. (2022). Leadership for inclusive online learning in public primary schools during COVID-19: A multiple case study in Hong Kong. *Educational Management Administration & Leadership*, 174114322211353. https://doi.org/10.1177/17411432221135310

Leithwood, K., Harris, A., & Hopkins, D. (2020). Seven strong claims about successful school leadership revisited. *School Leadership and Management*, *40*(1), 5–22. https://doi.org/10.1080/13632434.2019.1596077

Levitt, R., Pollack, J., & Whyte, J. (2024). Leadership and the dynamics of projects: Ray Levitt’s insights on project leadership. *Project Leadership and Society*, *5*, 100131. https://doi.org/10.1016/j.plas.2024.100131

Levy, K. L., Sheffield, V., Sturza, J., & Heidemann, L. A. (2023). Important Leadership Skills and Benefits of Shared Leadership Training for Chief Residents: A Delphi Analysis. *Journal of Healthcare Leadership*, *Volume 15*, 221–230. https://doi.org/10.2147/JHL.S413799

Lewis, E. (2021). Best Practices for Improving the Quality of the Online Course Design and Learners Experience. *The Journal of Continuing Higher Education*, *69*(1), 61–70. https://doi.org/10.1080/07377363.2020.1776558

Lourens, A., & Truter, N. (2023). Towards Sustainability - Fostering Gender Dimensions for Inclusiveness in Science Technology Engineering and Production (Step) Fields. *SEFI 2023 - 51st Annual Conference of the European Society for Engineering Education: Engineering Education for Sustainability, Proceedings*, 779–792. https://doi.org/10.21427/GKSF-5C02

Lu, X. (2024). Distributed leadership in Chinese higher education: Conceptual understanding and barriers to its implementation. *Educational Management Administration & Leadership*, *52*(6), 1352–1368. https://doi.org/10.1177/17411432221145408

Maheshwari, G., Clarke, S., Nguyen, Q.-A. N., McClelland, R., & Kunte, M. (2024). Effect of E-leadership on employees’ outcomes in the higher education sector during COVID-19 and beyond: A case study from Vietnam. *Educational Management Administration & Leadership*. https://doi.org/10.1177/17411432231222715

Maheshwari, G., & Nayak, R. (2022). Women leadership in Vietnamese higher education institutions: An exploratory study on barriers and enablers for career enhancement. *Educational Management Administration & Leadership*, *50*(5), 758–775. https://doi.org/10.1177/1741143220945700

Maxwell, A., & Riley, P. (2017). Emotional demands, emotional labour and occupational outcomes in school principals. *Educational Management Administration & Leadership*, *45*(3), 484–502. https://doi.org/10.1177/1741143215607878

McLennan, N. (2023). Creating a new leadership model: cooperative leadership. In *Research Handbook on Public Leadership* (pp. 23–41). Edward Elgar Publishing. https://doi.org/10.4337/9781786439673.00009

Menkhoff, T., Kan, S. N., & Cheong, K. C. K. (2024). *Visions for the Future*. WORLD SCIENTIFIC. https://doi.org/10.1142/13836

Mukhuty, S., Upadhyay, A., & Rothwell, H. (2022). Strategic sustainable development of Industry 4.0 through the lens of social responsibility: The role of human resource practices. *Business Strategy and the Environment*, *31*(5), 2068–2081. https://doi.org/10.1002/bse.3008

Mulaudzi, L. (2024). Evaluating impact: South Africa’s e-education white paper on digital equity and post-COVID education leadership. *Cogent Education*, *11*(1). https://doi.org/10.1080/2331186X.2024.2415749

Ninković, S. R., & Knežević Florić, O. Č. (2018). Transformational school leadership and teacher self-efficacy as predictors of perceived collective teacher efficacy. *Educational Management Administration & Leadership*, *46*(1), 49–64. https://doi.org/10.1177/1741143216665842

O’Sullivan, K., Bird, N., & Marshall, K. (2021). The DreamSpace STEM-21CLD model as an aid to inclusion of pupils with special education needs. *European Journal of Special Needs Education*, *36*(3), 469–477. https://doi.org/10.1080/08856257.2020.1762989

Ortega, C. A., Keah, N. M., Dorismond, C., Peterson, A. A., Flanary, V. A., Brenner, M. J., & Esianor, B. I. (2023). Leveraging the virtual landscape to promote diversity, equity, and inclusion in Otolaryngology-Head &amp; Neck Surgery. *American Journal of Otolaryngology*, *44*(1), 103673. https://doi.org/10.1016/j.amjoto.2022.103673

Özkan Tuncay, F., Yaşar, Ö., & Sevimligül, G. (2018). Conflict management styles of nurse managers working in inpatient institutions: the case of Turkey. *Journal of Nursing Management*, *26*(8), 945–952. https://doi.org/10.1111/jonm.12609

Pham, L. D., Matthews, G. F., & Cravens, X. (2022). What Students Value Most: A Qualitative Examination of Learner Experiences in a Fully Online Degree Program. *Teachers College Record: The Voice of Scholarship in Education*, *124*(2), 143–169. https://doi.org/10.1177/01614681221086460

Pittman, J., Severino, L., DeCarlo-Tecce, M. J., & Kiosoglous, C. (2021). An action research case study: digital equity and educational inclusion during an emergent COVID-19 divide. *Journal for Multicultural Education*, *15*(1), 68–84. https://doi.org/10.1108/JME-09-2020-0099

Ryan, R. M., & Deci, E. L. (2020). Intrinsic and extrinsic motivation from a self-determination theory perspective: Definitions, theory, practices, and future directions. *Contemporary Educational Psychology*, *61*, 101860. https://doi.org/10.1016/j.cedpsych.2020.101860

Section, I. (2024). Kaplan Business School’s student-centred approach: An interview with Professor James Adonopoulos. *Journal of Applied Learning & Teaching*, *7*(Special Issue 1). https://doi.org/10.37074/jalt.2024.7.s1.5

Serrano, D. R., Fraguas-Sánchez, A. I., González-Burgos, E., Martín, P., Llorente, C., & Lalatsa, A. (2023). Women as Industry 4.0. entrepreneurs: unlocking the potential of entrepreneurship in Higher Education in STEM-related fields. *Journal of Innovation and Entrepreneurship*, *12*(1), 78. https://doi.org/10.1186/s13731-023-00346-4

Shaked, H. (2023). How Social Justice Leadership Complements Instructional Leadership. *Leadership and Policy in Schools*, 1–16. https://doi.org/10.1080/15700763.2023.2282534

Sharma, U., Laletas, S., May, F., & Grove, C. (2023). “In any crisis there is an opportunity for us to learn something new”: Australian teacher experiences during COVID-19. *The Australian Educational Researcher*, *50*(5), 1303–1321. https://doi.org/10.1007/s13384-022-00556-x

Sharpley, D. (2024). *Leadership Principles and Purpose*. Productivity Press. https://doi.org/10.4324/9781003439707

Shukla, B., Soni, K. M., Sujatha, R., & Hasteer, N. (2023). Roadmap to inclusive curriculum: a step towards Multidisciplinary Engineering Education for holistic development. *Journal of Engineering Education Transformations*, *36*(3), 134–145. https://doi.org/10.16920/jeet/2023/v36i3/23105

Smith, E. (2023). The Inclusive Leadership Workshop. *Forensic Science International: Synergy*, *6*, 100407. https://doi.org/10.1016/j.fsisyn.2023.100407

Sork, T. J. (2020). Developing Institutional Leadership for Improving Teaching–Learning with New Technologies. In *Teaching Learning and New Technologies in Higher Education* (pp. 55–65). Springer Singapore. https://doi.org/10.1007/978-981-15-4847-5_5

Sweeney, A. B. (2018). Lab mentors in a two-plus-two nursing program: A retrospective evaluation. *Teaching and Learning in Nursing*, *13*(3), 157–160. https://doi.org/10.1016/j.teln.2018.03.006

Tan, C. Y. (2024). Influence of Cultural Values on Singapore School Leadership. *Educational Management Administration & Leadership*, *52*(2), 280–303. https://doi.org/10.1177/17411432211073414

Uddin, M., & Johnson, K. (2023). Engineering Faculty & Staff Inclusive Excellence Training: Broadening Engineering Pedagogy for All. *SEFI 2023 - 51st Annual Conference of the European Society for Engineering Education: Engineering Education for Sustainability, Proceedings*, 2971–2980. https://doi.org/10.21427/CFAE-K616

Uleanya, C. (2023). Reconceptualising Disabilities and Inclusivity for the Postdigital Era: Recommendations to Educational Leaders. *Education Sciences*, *13*(1), 51. https://doi.org/10.3390/educsci13010051

Uygur, M., Ayçiçek, B., Doğrul, H., & Yanpar Yelken, T. (2020). Investigating Stakeholders’ Views on Technology Integration: The Role of Educational Leadership for Sustainable Inclusive Education. *Sustainability*, *12*(24), 10354. https://doi.org/10.3390/su122410354

Vaismoradi, M., Griffiths, P., Turunen, H., & Jordan, S. (2016). Transformational leadership in nursing and medication safety education: a discussion paper. *Journal of Nursing Management*, *24*(7), 970–980. https://doi.org/10.1111/jonm.12387

Walzer, D. (2023). *Leadership in Music Technology Education*. Focal Press. https://doi.org/10.4324/9781003152460

Yang, Y., Chen, L., He, W., Sun, D., & Salas-Pilco, S. Z. (2024). Artificial Intelligence for Enhancing Special Education for K-12: A Decade of Trends, Themes, and Global Insights (2013–2023). *International Journal of Artificial Intelligence in Education*. https://doi.org/10.1007/s40593-024-00422-0
